# Supplementary material for: Development of New Mental and Physical Health Sequelae among US Veterans after COVID-19
Source: MDPI journal article supplement (doi:10.3390/jcm11123390), 2022-06-13
Supplement: s1 [file s1]

## **Supplements**

- 1). Supplement Appendix X – Propensity score matching analysis – Page 2
- 2). Table S1 - Baseline Characteristics of the Total Cohort - Page 5
- 3). Table S2 - Incidence of Physical and Mental conditions between COVID-19 Negative vs. Positive Patients (Un-matched sample) – Page 6
- 4). Figure S1 - Likelihood of development of new physical and mental health conditions among matched COVID-19 positive hospitalized patients compared to matched COVID-19 positive outpatient. – Page 8
- 5). Table S3 - Incidence of Physical and Mental conditions between matched COVID-19 Negative vs. Positive Patients (Follow up period – 15 days post-index to 3 months) – Page 9
- 6). Table S4 - Incidence of Physical and Mental conditions between matched hospitalized COVID-19 positive vs. outpatient COVID-19 positive. (Follow up period – 15 days post-index to 3 months) – Page 11
- 7). ICD-10 codes to define Physical and Mental Health Conditions - Page 12

## Supplement Section SX

### Distribution of Propensity Scores before Matching

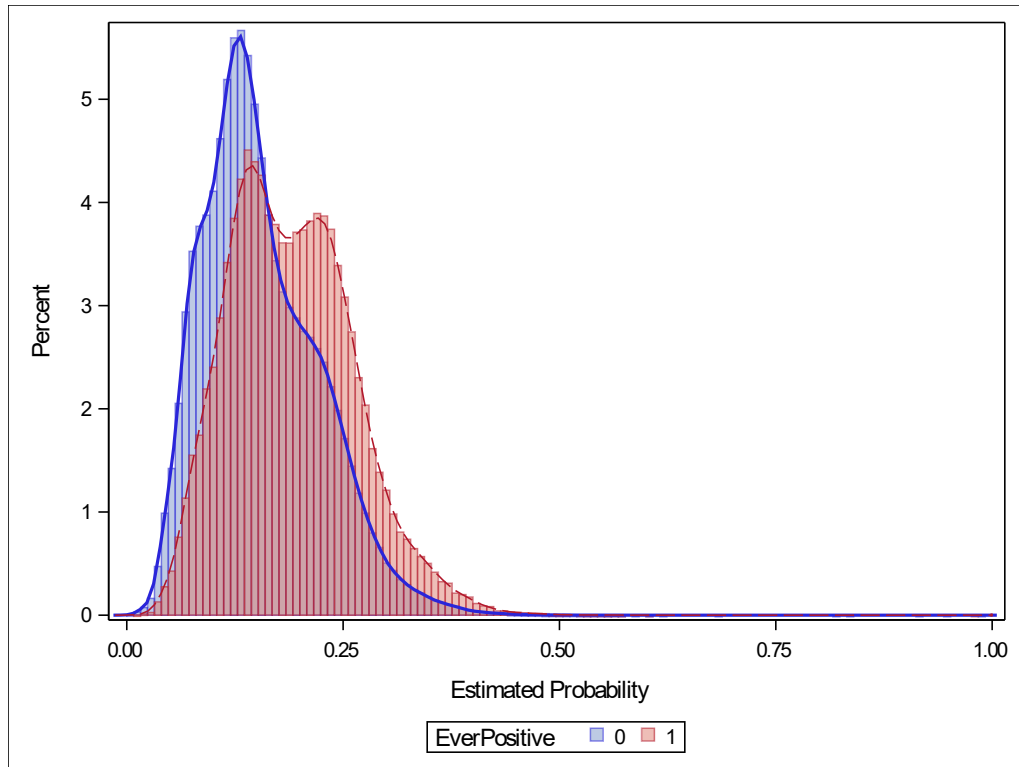

The range of extended support region of propensity scores was (0.00821, 0.980492)

Total number of

|                  | Sample Size | Within Support Region | Matched |
|------------------|-------------|-----------------------|---------|
| COVID19 Positive | 112,373     | 112,373               | 112,373 |
| COVID19 Negative | 586,183     | 586,150               | 112,373 |

# Balance of Baseline characteristics before and after matching: Love Plot

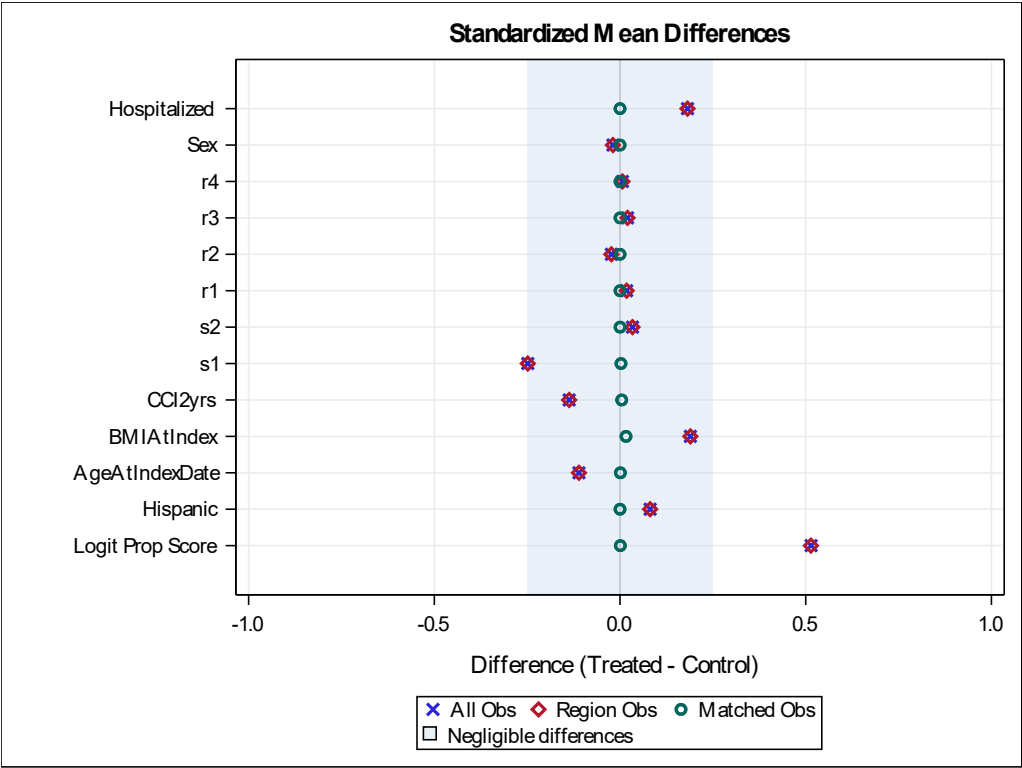

s1: Current smoker, s2: Former smoker, r1: American Indian or Alaskan Native, r2: Asian, r3: Black or African American, r4: Native Hawaiian or Other Pacific Islander, r5: Unknown race, r6: White.

## Distribution of Propensity Scores After Matching

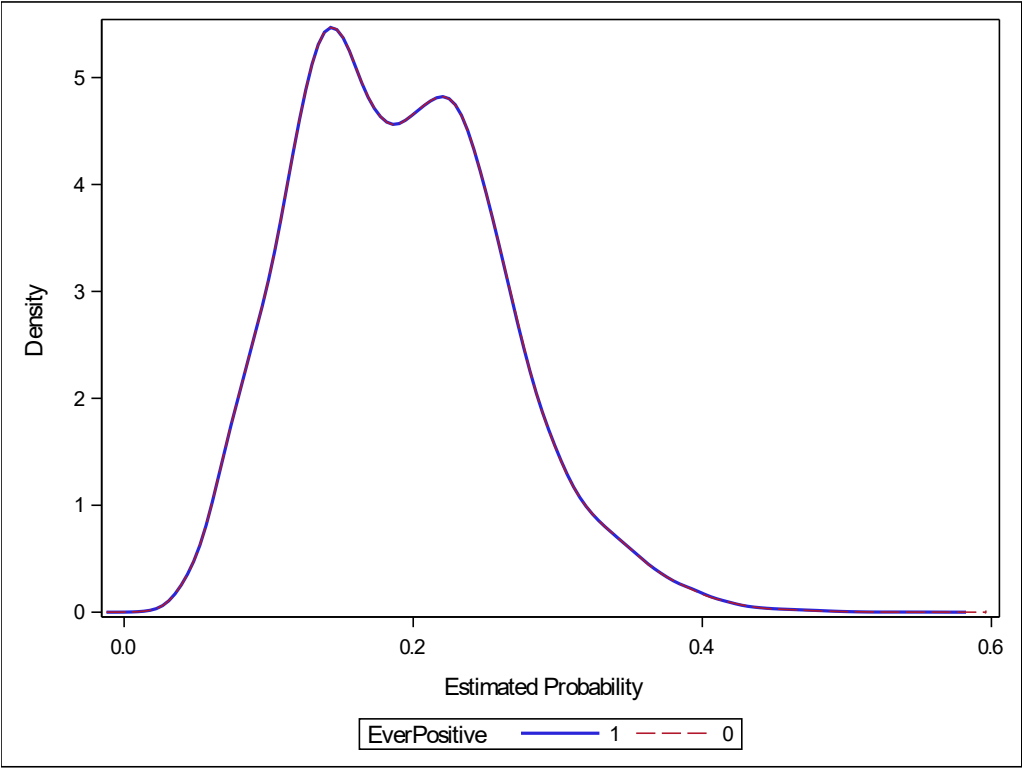

## Standardized Mean Differences between COVID19 Positive and COVID19 Negative Cases

| Variable                                  | Observations | Mean Difference | Standard Deviation | Standardized Difference | Percent Reduction | Variance Ratio |
|-------------------------------------------|--------------|-----------------|--------------------|-------------------------|-------------------|----------------|
| Logit Prop Score                          | All          | 0.266           | 0.518              | 0.514                   |                   | 0.87           |
|                                           | Matched      | 0.000           |                    | 0.001                   | 99.85             | 1.00           |
| Hispanic                                  | All          | 0.023           | 0.287              | 0.081                   |                   | 1.26           |
|                                           | Matched      | 0               |                    | 0                       | 100               | 1.00           |
| Age At Index Date                         | All          | -1.709          | 15.459             | -0.111                  |                   | 1.12           |
|                                           | Matched      | 0.015           |                    | 0.001                   | 99.13             | 1.01           |
| BMI At Index Date                         | All          | 1.204           | 6.355              | 0.189                   |                   | 1.00           |
|                                           | Matched      | 0.102           |                    | 0.016                   | 91.5              | 0.92           |
| Charlson Comorbidity Index (past 2 years) | All          | -0.306          | 2.231              | -0.137                  |                   | 0.84           |
|                                           | Matched      | 0.010           |                    | 0.005                   | 96.69             | 1.02           |
| s1                                        | All          | -0.092          | 0.370              | -0.248                  |                   | 0.63           |
|                                           | Matched      | 0.001           |                    | 0.003                   | 98.96             | 1.01           |
| s2                                        | All          | 0.017           | 0.495              | 0.034                   |                   | 1.01           |
|                                           | Matched      | 0.000           |                    | 0.000                   | 99.36             | 1.00           |
| r1                                        | All          | 0.002           | 0.092              | 0.018                   |                   | 1.21           |
|                                           | Matched      | 0               |                    | 0                       | 100               | 1.00           |
| r2                                        | All          | -0.002          | 0.103              | -0.023                  |                   | 0.80           |
|                                           | Matched      | 0               |                    | 0                       | 100               | 1.00           |
| r3                                        | All          | 0.008           | 0.420              | 0.020                   |                   | 1.03           |
|                                           | Matched      | 0               |                    | 0                       | 100               | 1.00           |
| r4                                        | All          | 0.001           | 0.096              | 0.006                   |                   | 1.07           |
|                                           | Matched      | 0               |                    | 0                       | 100               | 1.00           |
| Male                                      | All          | -0.006          | 0.312              | -0.019                  |                   | 0.95           |
|                                           | Matched      | 0               |                    | 0                       | 100               | 1.00           |
| Hospitalized                              | All          | 0.067           | 0.369              | 0.182                   |                   | 0.72           |
|                                           | Matched      | 0               |                    | 0                       | 100               | 1.00           |

Standard deviation of All observations used to compute standardized differences. s1: Current smoker, s2: Former smoker, s3: Never smoker, S4 missing smoking history. r1: American Indian or Alaskan Native, r2: Asian, r3: Black or African American, r4: Native Hawaiian or Other Pacific Islander, r5: Unknown race, r6: White.

| <b>Table S1 - Baseline Characteristics of the Total Cohort</b> |                                |
|----------------------------------------------------------------|--------------------------------|
|                                                                | <b>Total Population, N (%)</b> |
| <b>Age, Mean (<math>\pm</math> SD)</b>                         | 61.0 $\pm$ 15.4                |
| <b>Gender</b>                                                  |                                |
| Male                                                           | 690528 (88.7%)                 |
| Female                                                         | 88210 (11.3%)                  |
| <b>Ethnicity</b>                                               |                                |
| Non-Hispanic                                                   | 687550 (88.3%)                 |
| Hispanic                                                       | 65558 (8.42%)                  |
| Unknown                                                        | 25630 (3.29%)                  |
| <b>Race</b>                                                    |                                |
| White                                                          | 530508 (68.1%)                 |
| Black or African American                                      | 174892 (22.5%)                 |
| American Indian or Alaska Native                               | 6299 (.809%)                   |
| Asian                                                          | 8852 (1.14%)                   |
| Native Hawaiian or Other Pacific Islander                      | 6930 (.890%)                   |
| Unknown                                                        | 41907 (5.38%)                  |
| Missing                                                        | 9350 (1.20%)                   |
| <b>BMI, Mean (<math>\pm</math> SD)</b>                         | 30.1 $\pm$ 6.39                |
| <b>CCI2yrs, Mean (<math>\pm</math> SD)</b>                     | 1.95 $\pm$ 2.30                |

**Table S2 - Incidence of Physical and Mental conditions between COVID-19 Negative vs. Positive Patients (Un-matched sample)**

|                                 | Hospitalized Cohort |                          |                          |         |  | Outpatient Cohort |                          |                          |         |
|---------------------------------|---------------------|--------------------------|--------------------------|---------|--|-------------------|--------------------------|--------------------------|---------|
|                                 | Total, n (%)        | COVID-19 Negative, n (%) | COVID-19 Positive, n (%) | P Value |  | Total             | COVID-19 Negative, n (%) | COVID-19 Positive, n (%) | P Value |
| <b>Pulmonary</b>                |                     |                          |                          |         |  |                   |                          |                          |         |
| Venous thromboembolism          | 4412<br>(3.24%)     | 3523<br>(2.91%)          | 889<br>(5.86%)           | <.001   |  | 2573<br>(.426%)   | 1796<br>(.358%)          | 777<br>(.753%)           | <.001   |
| Pulmonary Circulation Disorders | 4525<br>(3.33%)     | 3757<br>(3.11%)          | 768<br>(5.08%)           | <.001   |  | 2290<br>(.377%)   | 1730<br>(.343%)          | 560<br>(.538%)           | <.001   |
| Sleep Apnea                     | 2959<br>(3.11%)     | 2581<br>(3.03%)          | 378<br>(3.75%)           | <.001   |  | 7543<br>(1.91%)   | 6517<br>(1.98%)          | 1026<br>(1.55%)          | <.001   |
| Chronic Lung Disease            | 4802<br>(5.29%)     | 3918<br>(4.88%)          | 884<br>(8.49%)           | <.001   |  | 5720<br>(1.25%)   | 4716<br>(1.26%)          | 1004<br>(1.22%)          | 0.40    |
| <b>Renal</b>                    |                     |                          |                          |         |  |                   |                          |                          |         |
| Acute Kidney Injury             | 11790<br>(10.2%)    | 9705<br>(9.42%)          | 2085<br>(16.4%)          | <.001   |  | 3939<br>(.673%)   | 3147<br>(.649%)          | 792<br>(.784%)           | <.001   |
| Chronic Kidney Disease          | 5350<br>(4.98%)     | 4591<br>(4.80%)          | 759<br>(6.48%)           | <.001   |  | 3636<br>(.662%)   | 3061<br>(.673%)          | 575<br>(.613%)           | 0.04    |
| Dialysis                        | 1152<br>(.802%)     | 968 (.758%)              | 184<br>(1.15%)           | <.001   |  | 621<br>(.100%)    | 515 (.100%)              | 106<br>(.100%)           | 0.98    |
| <b>Cardiovascular</b>           |                     |                          |                          |         |  |                   |                          |                          |         |
| Ischemic Heart Disease          | 6763<br>(7.59%)     | 5986<br>(7.59%)          | 777<br>(7.60%)           | 0.97    |  | 5106<br>(1.04%)   | 4433<br>(1.09%)          | 673<br>(.788%)           | <.001   |
| Cerebrovascular Accident        | 3791<br>(2.97%)     | 3396<br>(2.99%)          | 395<br>(2.80%)           | 0.22    |  | 2557<br>(.435%)   | 2165<br>(.444%)          | 392<br>(.390%)           | 0.018   |
| Congestive Heart Failure        | 7424<br>(6.82%)     | 6666<br>(6.90%)          | 758<br>(6.15%)           | <.001   |  | 4175<br>(.737%)   | 3557<br>(.758%)          | 618<br>(.635%)           | <.001   |
| Peripheral Vascular Disease     | 3992<br>(3.60%)     | 3633<br>(3.70%)          | 359<br>(2.79%)           | <.001   |  | 3322<br>(.594%)   | 2930<br>(.634%)          | 392<br>(.404%)           | <.001   |
| Cardiac Arrhythmia              | 9968<br>(11.5%)     | 8475<br>(11.1%)          | 1493<br>(15.1%)          | <.001   |  | 8017<br>(1.67%)   | 6394<br>(1.62%)          | 1623<br>(1.94%)          | <.001   |
| Hypertension Uncomplicated      | 2837<br>(10.7%)     | 2484<br>(10.5%)          | 353<br>(12.2%)           | 0.004   |  | 4983<br>(2.11%)   | 4150<br>(2.13%)          | 833<br>(2.02%)           | 0.17    |

|                                |                  |                  |                 |        |                 |                 |                 |       |
|--------------------------------|------------------|------------------|-----------------|--------|-----------------|-----------------|-----------------|-------|
| Hypertension Complicated       | 9411<br>(9.34%)  | 8077<br>(9.01%)  | 1334<br>(12.0%) | <.0001 | 4286<br>(.789%) | 3628<br>(.807%) | 658<br>(.702%)  | <.001 |
| <b>Endocrine</b>               |                  |                  |                 |        |                 |                 |                 |       |
| Diabetes Uncomplicated         | 2025<br>(2.45%)  | 1735<br>(2.34%)  | 290<br>(3.44%)  | <.001  | 3225<br>(.734%) | 2616<br>(.714%) | 609<br>(.835%)  | <.001 |
| Diabetes Complicated           | 3052<br>(3.35%)  | 2562<br>(3.14%)  | 490<br>(5.16%)  | <.001  | 3384<br>(.702%) | 2809<br>(.701%) | 575<br>(.710%)  | 0.78  |
| <b>Others</b>                  |                  |                  |                 |        |                 |                 |                 |       |
| Liver Disease                  | 3238<br>(2.65%)  | 2876<br>(2.65%)  | 362<br>(2.61%)  | 0.75   | 3487<br>(.633%) | 3040<br>(.668%) | 447<br>(.466%)  | <.001 |
| Coagulopathy                   | 4406<br>(3.27%)  | 3468<br>(2.90%)  | 938<br>(6.20%)  | <.001  | 1867<br>(.309%) | 1455<br>(.291%) | 412<br>(.399%)  | <.001 |
| Fluid & Electrolytes Disorders | 14197<br>(14.8%) | 11546<br>(13.6%) | 2651<br>(24.7%) | <.001  | 7072<br>(1.33%) | 5740<br>(1.31%) | 1332<br>(1.42%) | 0.005 |
| Neurological Disorders         | 5837<br>(4.90%)  | 4883<br>(4.60%)  | 954<br>(7.35%)  | <.001  | 3708<br>(.661%) | 3118<br>(.671%) | 590<br>(.610%)  | 0.031 |
| <b>Mental Disorders</b>        |                  |                  |                 |        |                 |                 |                 |       |
| Depressive Episode             | 5014<br>(5.06%)  | 4259<br>(4.84%)  | 755<br>(6.76%)  | <.001  | 6934<br>(1.61%) | 5889<br>(1.67%) | 1045<br>(1.37%) | <.001 |
| Panic Disorder                 | 430 (.297%)      | 378 (.294%)      | 52 (.319%)      | 0.57   | 1165<br>(.192%) | 1027<br>(.204%) | 138<br>(.133%)  | <.001 |
| Generalized Anxiety            | 1066<br>(.779%)  | 954 (.786%)      | 112<br>(.723%)  | 0.40   | 3241<br>(.573%) | 2768<br>(.591%) | 473<br>(.487%)  | <.001 |
| PTSD                           | 1535<br>(1.37%)  | 1361<br>(1.36%)  | 174<br>(1.39%)  | 0.79   | 4225<br>(.990%) | 3639<br>(1.04%) | 586<br>(.777%)  | <.001 |
| Adjustment Disorders           | 2566<br>(2.04%)  | 2204<br>(1.97%)  | 362<br>(2.58%)  | <.001  | 5392<br>(1.02%) | 4520<br>(1.03%) | 872<br>(.957%)  | 0.040 |
| Insomnia                       | 4387<br>(3.84%)  | 3735<br>(3.68%)  | 652<br>(5.07%)  | <.001  | 7591<br>(1.57%) | 6509<br>(1.63%) | 1082<br>(1.28%) | <.001 |
| Dementia                       | 3085<br>(2.28%)  | 2623<br>(2.17%)  | 462<br>(3.17%)  | <.001  | 1700<br>(.280%) | 1409<br>(.279%) | 291<br>(.284%)  | 0.80  |

**Figure S1: Likelihood of development of new physical and mental health conditions among matched COVID-19 positive hospitalized patients compared to matched COVID-19 positive outpatient.**

### Mental Conditions

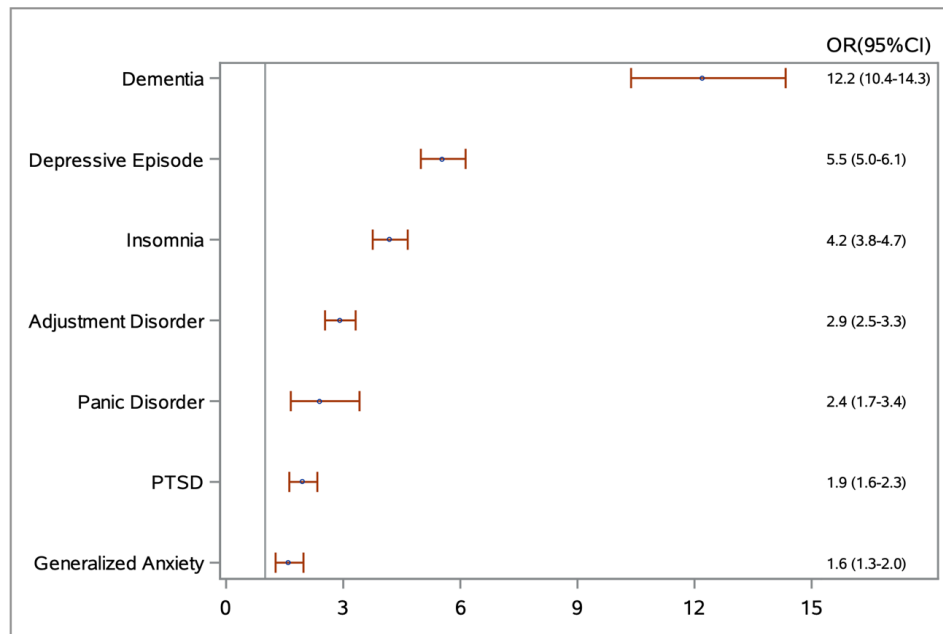

### Physical Conditions

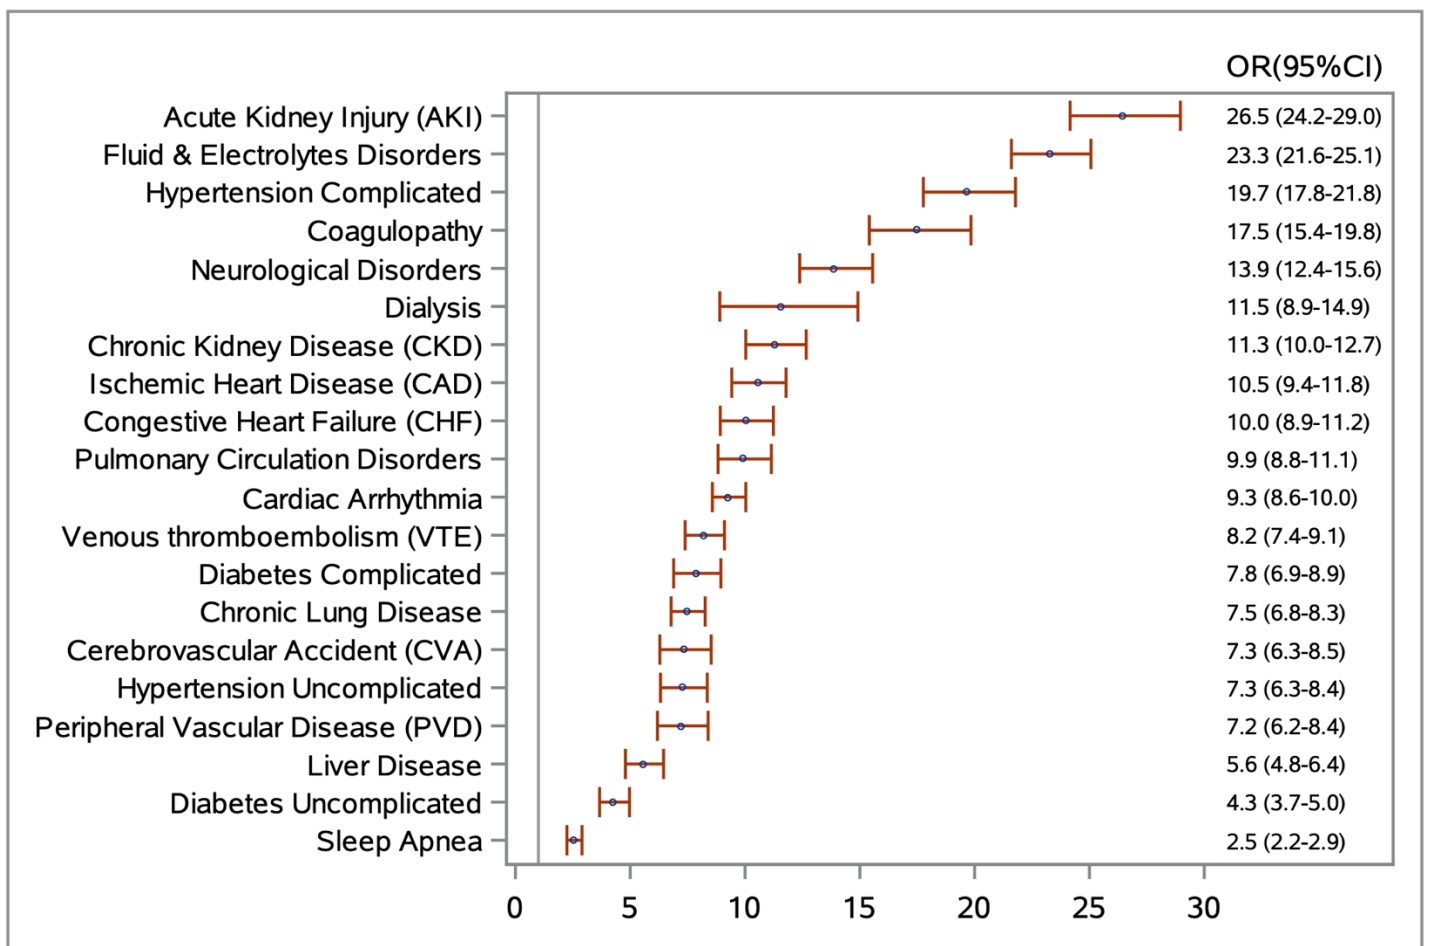



**Table S3: Incidence of Physical and Mental conditions between matched COVID-19 Negative vs. Positive Patients  
(Follow up period – 15 days post-index to 3 months)**

|                                 | Hospitalized Cohort         |                             |         |  | Outpatient Cohort           |                             |         |
|---------------------------------|-----------------------------|-----------------------------|---------|--|-----------------------------|-----------------------------|---------|
|                                 | COVID-19<br>Negative, n (%) | COVID-19<br>Positive, n (%) | P Value |  | COVID-19<br>Negative, n (%) | COVID-19<br>Positive, n (%) | P Value |
| <b>Pulmonary</b>                |                             |                             |         |  |                             |                             |         |
| Venous thromboembolism          | 326 (2.43%)                 | 665 (4.99%)                 | <.0001  |  | 265 (.283%)                 | 640 (.681%)                 | <.0001  |
| Pulmonary Circulation Disorders | 306 (2.28%)                 | 563 (4.24%)                 | <.0001  |  | 253 (.269%)                 | 446 (.471%)                 | <.0001  |
| Sleep Apnea                     | 261 (2.88%)                 | 264 (3.02%)                 | 0.6005  |  | 1166 (2.01%)                | 849 (1.42%)                 | <.0001  |
| Chronic Lung Disease            | 307 (3.26%)                 | 546 (5.99%)                 | <.0001  |  | 671 (.926%)                 | 749 (1.00%)                 | 0.1290  |
| <b>Renal</b>                    |                             |                             |         |  |                             |                             |         |
| Acute Kidney Injury             | 744 (6.47%)                 | 1171 (10.5%)                | <.0001  |  | 362 (.397%)                 | 455 (.495%)                 | 0.0016  |
| Chronic Kidney Disease          | 392 (3.69%)                 | 466 (4.56%)                 | 0.0016  |  | 436 (.507%)                 | 436 (.511%)                 | 0.9126  |
| Dialysis                        | 92 (.650%)                  | 140 (.999%)                 | 0.0012  |  | 67 (.069%)                  | 90 (.093%)                  | 0.0662  |
| <b>Cardiovascular</b>           |                             |                             |         |  |                             |                             |         |
| Ischemic Heart Disease          | 543 (6.13%)                 | 517 (5.79%)                 | 0.3411  |  | 663 (.865%)                 | 525 (.678%)                 | <.0001  |
| Cerebrovascular Accident        | 263 (2.07%)                 | 277 (2.23%)                 | 0.3929  |  | 295 (.321%)                 | 315 (.344%)                 | 0.3849  |
| Congestive Heart Failure        | 613 (5.66%)                 | 528 (4.88%)                 | 0.0104  |  | 550 (.625%)                 | 510 (.576%)                 | 0.1805  |
| Peripheral Vascular Disease     | 323 (2.89%)                 | 257 (2.28%)                 | 0.0039  |  | 428 (.490%)                 | 326 (.370%)                 | 0.0001  |
| Cardiac Arrhythmia              | 764 (8.98%)                 | 1004 (11.6%)                | <.0001  |  | 981 (1.32%)                 | 1250 (1.64%)                | <.0001  |
| Hypertension Uncomplicated      | 220 (8.65%)                 | 219 (8.94%)                 | 0.7232  |  | 629 (1.71%)                 | 651 (1.78%)                 | 0.4811  |
| Hypertension Complicated        | 604 (6.08%)                 | 807 (8.27%)                 | <.0001  |  | 467 (.550%)                 | 462 (.542%)                 | 0.8225  |
| <b>Endocrine</b>                |                             |                             |         |  |                             |                             |         |
| Diabetes Uncomplicated          | 161 (2.02%)                 | 203 (2.78%)                 | 0.0021  |  | 461 (.670%)                 | 502 (.764%)                 | 0.0411  |
| Diabetes Complicated            | 235 (2.65%)                 | 285 (3.45%)                 | 0.0022  |  | 458 (.606%)                 | 457 (.624%)                 | 0.6601  |
| <b>Others</b>                   |                             |                             |         |  |                             |                             |         |
| Liver Disease                   | 233 (1.90%)                 | 228 (1.86%)                 | 0.8004  |  | 486 (.563%)                 | 363 (.416%)                 | <.0001  |
| Coagulopathy                    | 232 (1.73%)                 | 556 (4.18%)                 | <.0001  |  | 170 (.182%)                 | 254 (.270%)                 | <.0001  |
| Fluid & Electrolytes Disorders  | 879 (9.02%)                 | 1410 (14.9%)                | <.0001  |  | 706 (.847%)                 | 783 (.919%)                 | 0.1139  |
| Neurological Disorders          | 350 (2.92%)                 | 657 (5.72%)                 | <.0001  |  | 444 (.508%)                 | 420 (.476%)                 | 0.3412  |
| <b>Mental Disorders</b>         |                             |                             |         |  |                             |                             |         |
| Depressive Episode              | 331 (3.30%)                 | 460 (4.60%)                 | <.0001  |  | 846 (1.26%)                 | 749 (1.07%)                 | 0.0010  |
| Panic Disorder                  | 24 (.168%)                  | 32 (.223%)                  | 0.2901  |  | 162 (.172%)                 | 95 (.100%)                  | <.0001  |

|                     |             |             |        |  |              |             |        |
|---------------------|-------------|-------------|--------|--|--------------|-------------|--------|
| Generalized Anxiety | 64 (.471%)  | 79 (.578%)  | 0.2195 |  | 422 (.481%)  | 364 (.411%) | 0.0273 |
| PTSD                | 106 (.944%) | 120 (1.08%) | 0.2978 |  | 563 (.853%)  | 450 (.654%) | <.0001 |
| Adjustment Disorder | 187 (1.49%) | 250 (2.00%) | 0.0020 |  | 669 (.813%)  | 667 (.801%) | 0.7935 |
| Insomnia            | 301 (2.62%) | 405 (3.57%) | <.0001 |  | 1005 (1.35%) | 850 (1.10%) | <.0001 |
| Dementia            | 208 (1.55%) | 300 (2.32%) | <.0001 |  | 169 (.179%)  | 217 (.232%) | 0.0106 |

**Table S4: Incidence of Physical and Mental conditions between matched hospitalized COVID-19 positive vs. outpatient COVID-19 positive. (Follow up period – 15 days post-index to 3 months)**

|                                 | Total, n (%) | Hospitalized COVID-19 Positive, n (%) | Outpatient COVID-19 Positive, n (%) | P Value |
|---------------------------------|--------------|---------------------------------------|-------------------------------------|---------|
| <b>Pulmonary</b>                |              |                                       |                                     |         |
| Venous thromboembolism          | 1305 (1.22%) | 665 (4.99%)                           | 640 (.681%)                         | <.0001  |
| Pulmonary Circulation Disorders | 1009 (.934%) | 563 (4.24%)                           | 446 (.471%)                         | <.0001  |
| Sleep Apnea                     | 1113 (1.62%) | 264 (3.02%)                           | 849 (1.42%)                         | <.0001  |
| Chronic Lung Disease            | 1295 (1.55%) | 546 (5.99%)                           | 749 (1.00%)                         | <.0001  |
| <b>Renal</b>                    |              |                                       |                                     |         |
| Acute Kidney Injury             | 1626 (1.58%) | 1171 (10.5%)                          | 455 (.495%)                         | <.0001  |
| Chronic Kidney Disease          | 902 (.944%)  | 466 (4.56%)                           | 436 (.511%)                         | <.0001  |
| Dialysis                        | 230 (.208%)  | 140 (.999%)                           | 90 (.093%)                          | <.0001  |
| <b>Cardiovascular</b>           |              |                                       |                                     |         |
| Ischemic Heart Disease          | 1042 (1.21%) | 517 (5.79%)                           | 525 (.678%)                         | <.0001  |
| Cerebrovascular Accident        | 592 (.570%)  | 277 (2.23%)                           | 315 (.344%)                         | <.0001  |
| Congestive Heart Failure        | 1038 (1.04%) | 528 (4.88%)                           | 510 (.576%)                         | <.0001  |
| Peripheral Vascular Disease     | 583 (.586%)  | 257 (2.28%)                           | 326 (.370%)                         | <.0001  |
| Cardiac Arrhythmia              | 2254 (2.66%) | 1004 (11.6%)                          | 1250 (1.64%)                        | <.0001  |
| Hypertension Uncomplicated      | 870 (2.23%)  | 219 (8.94%)                           | 651 (1.78%)                         | <.0001  |
| Hypertension Complicated        | 1269 (1.34%) | 807 (8.27%)                           | 462 (.542%)                         | <.0001  |
| <b>Endocrine</b>                |              |                                       |                                     |         |
| Diabetes Uncomplicated          | 705 (.965%)  | 203 (2.78%)                           | 502 (.764%)                         | <.0001  |
| Diabetes Complicated            | 742 (.910%)  | 285 (3.45%)                           | 457 (.624%)                         | <.0001  |
| <b>Others</b>                   |              |                                       |                                     |         |
| Liver Disease                   | 591 (.594%)  | 228 (1.86%)                           | 363 (.416%)                         | <.0001  |
| Coagulopathy                    | 810 (.754%)  | 556 (4.18%)                           | 254 (.270%)                         | <.0001  |
| Fluid & Electrolytes Disorders  | 2193 (2.32%) | 1410 (14.9%)                          | 783 (.919%)                         | <.0001  |
| Neurological Disorders          | 1077 (1.08%) | 657 (5.72%)                           | 420 (.476%)                         | <.0001  |
| <b>Mental Disorders</b>         |              |                                       |                                     |         |
| Depressive Episode              | 1209 (1.51%) | 460 (4.60%)                           | 749 (1.07%)                         | <.0001  |
| Panic Disorder                  | 127 (.117%)  | 32 (.223%)                            | 95 (.100%)                          | <.0001  |
| Generalized Anxiety             | 443 (.433%)  | 79 (.578%)                            | 364 (.411%)                         | 0.0055  |
| PTSD                            | 570 (.713%)  | 120 (1.08%)                           | 450 (.654%)                         | <.0001  |
| Adjustment Disorder             | 917 (.958%)  | 250 (2.00%)                           | 667 (.801%)                         | <.0001  |
| Insomnia                        | 1255 (1.42%) | 405 (3.57%)                           | 850 (1.10%)                         | <.0001  |
| Dementia                        | 517 (.486%)  | 300 (2.32%)                           | 217 (.232%)                         | <.0001  |

## **ICD-10 codes to define Physical and Mental Health Conditions**

### **Pulmonary:**

Venous Thromboembolism

I82, I26, I80.2, I80.1

Pulmonary Circulation Disorders

I26, I27, I28.0, I28.8, I28.9

Sleep Apnea

G47.3

Chronic Lung Disease

I27.8, I27.9, J40, J41, J42, J43, J44, J45, J46, J47, J60, J61, J62,  
J63, J64, J65, J66, J67, J68.4, J70.1, J70.3

### **Renal:**

Acute Kidney Injury

N17

Chronic Kidney Disease (CKD)

I12.0, I13.1, N18, N19, N25.0, Z49.1, Z49.2, Z94.0, Z99.2, D63.1, E08.22, E09.22, E10.22,  
E11.22, E13.22, N99.0

Dialysis

R88.0, Z99.2, Z49.31, Z49.32, Z49.01, Z49.02, N18.6, Z91.15

### **Cardiovascular:**

Ischemic Heart Disease or CAD

I20, I21, I22, I23, I24, I25

Cerebrovascular Accident

I60, I61, I62, I63, I66, I67, I68, I69

Congestive Heart Failure

I09.9, I11.0, I13.0, I13.2, I42.0, I4.5, I42.6, I42.7, I42.8, I42.9, I43, I50, P29.0

Peripheral Vascular Disease

I7.0, I71, I73.1, I73.8, I73.9, I77.1, I79.0, I79.2, K55.1, K55.8, K55.9, Z95.8, Z95.9

Cardiac Arrhythmia

I44.1, I44.2, I44.3, I45.6, I45.9, I47, I48, I49, R00.0, R00.1, R00.8, T82.1, Z45.0, Z95.0

Hypertension Uncomplicated

I10

Hypertension Complicated

I11, I12, I13, I15

### **Endocrine:**

Diabetes Uncomplicated

E10.0, E10.1, E10.9, E11.0, E11.1, E11.9, E12.0, E12.1, E12.9, E13.0, E13.1, E13.9, E14.0,  
E14.1, E14.9

Diabetes Complicated

E10.2, E10.3, E10.4, E10.5, E10.6, E10.7, E10.8, E11.2, E11.3, E11.4, E11.5, E11.6, E11.7,  
E11.8, E12.2, E12.3, E12.4, E12.5, E12.6, E12.7, E12.8, E13.2, E13.3, E13.4, E13.5, E13.6,  
E13.7, E13.8, E14.2, E14.3, E14.4, E14.5, E14.6, E14.7, E14.8

### **Others:**

Liver Disease

B18, I85, I86.4, I98.2, K70, K71.1, K71.3, K71.4, K71.5, K71.7, K72, K73, K74, K76.0, K76.2,  
K76.3, K76.4, K76.5, K76.6, K76.7, K76.8, K76.9, Z94.4

Coagulopathy

D65, D66, D67, D68, D69.1, D69.3, D69.4, D69.5, D69.6

Fluid & Electrolytes Disorders

E22.2, E86, E87

Neurological Disorders

G10, G11, G12, G13, G20, G21, G22, G25.4, G25.5, G31.2, G31.8, G31.9, G32, G35, G36, G37, G40, G41, G93.1, G93.4, R47.0, R56

**Mental Disorders:**

Depressive Episode

F32

Panic Disorder

F41.0

Generalized Anxiety

F41.1

PTSD

F43.1

Adjustment Disorders

F43.2

Insomnia

F51.0, G47.0

Dementia

F01, F02, F03, G30, G31.0, G31.83
